# Supplementary material for: Surgical outcomes of cervical spinal cord tumor in elderly patients assessed by the Japanese Orthopedic Association Cervical Myelopathy Evaluation Questionnaire
Source: Research Square preprint supplement (doi:10.21203/rs.3.rs-5376309/v1), 2024-12-17
Supplement: Supplementary file 1 [file 402a592d33f96fddaaec7e9d.docx]

Table 1

Table 2

Table 3

Table 4
